# Supplementary material
Source: PubMed Central journal article supplement (PMC3339882)
Supplement: supp_jc.2011-3255_11-3255-Supplemental_tables-1-5.pdf [file supp_jc.2011-3255_11-3255-Supplemental_tables-1-5.pdf]

**Supplemental Table 1. (Fasting visits only)**

Conventional lipid profiles

| Lipids                       | Visit | DM PE+   | <sup>a</sup> p | DM PE-   | <sup>b</sup> p | DM-      |
|------------------------------|-------|----------|----------------|----------|----------------|----------|
| N*                           |       | 22       |                | 62       |                | 18       |
| Total cholesterol<br>(mg/dL) | 1     | 183 ± 29 | 0.49           | 177 ± 30 | 0.17           | 188 ± 26 |
|                              | 2     | 241 ± 47 | 0.07           | 221 ± 35 | 0.16           | 236 ± 41 |
|                              | 3     | 267 ± 45 | 0.77           | 264 ± 51 | 0.79           | 267 ± 48 |
|                              | Term  | -        | -              | 268 ± 74 | 0.49           | 289 ± 63 |
| LDL-cholesterol<br>(mg/dL)   | 1     | 88 ± 13  | 0.05           | 75 ± 14  | 0.40           | 82 ± 16  |
|                              | 2     | 120 ± 18 | 0.06           | 103 ± 16 | 0.28           | 114 ± 21 |
|                              | 3     | 151 ± 24 | 0.32           | 139 ± 27 | 0.67           | 134 ± 17 |
|                              | Term  | -        | -              | 127 ± 37 | 0.40           | 154 ± 34 |
| Triglycerides<br>(mg/dL)     | 1     | 76 ± 9   | 0.35           | 71 ± 13  | 0.11           | 79 ± 8   |
|                              | 2     | 135 ± 20 | 0.07           | 118 ± 17 | 0.30           | 129 ± 23 |
|                              | 3     | 180 ± 33 | 0.82           | 177 ± 37 | 0.36           | 161 ± 31 |
|                              | Term  | -        | -              | 218 ± 34 | 0.38           | 247 ± 38 |
| VLDL-cholesterol<br>(mg/dL)  | 1     | 15 ± 2   | 0.35           | 14 ± 3   | 0.11           | 16 ± 2   |
|                              | 2     | 27 ± 4   | 0.07           | 24 ± 3   | 0.69           | 23 ± 6   |
|                              | 3     | 38 ± 5   | 0.39           | 36 ± 7   | 0.31           | 32 ± 6   |
|                              | Term  | -        | -              | 44 ± 7   | 0.68           | 46 ± 6   |
| HDL-cholesterol<br>(mg/dL)   | 1     | 75 ± 16  | 0.08           | 82 ± 18  | 0.93           | 83 ± 24  |
|                              | 2     | 89 ± 20  | 0.97           | 89 ± 20  | 0.54           | 86 ± 23  |
|                              | 3     | 72 ± 11  | 0.12           | 77 ± 17  | 0.41           | 81 ± 19  |
|                              | Term  | -        | -              | 78 ± 18  | 0.72           | 75 ± 24  |

\*Mean N confirmed fasting in each group. Values are shown as mean ± SD. For conversion to SI unit (mmol/L), multiply by 0.02586 (cholesterol) and 0.01129 (triglycerides).

<sup>a</sup>p: DM PE+ versus DM PE-, <sup>b</sup>p: DM PE- versus DM-.

DM, Diabetes Mellitus, DM-, non-diabetic controls, PE+, Pre-eclampsia, PE-, no Pre-eclampsia.

⌋ Significant increase (time trend analyses, visits 1-3; p<0.01)

**Supplemental Table 2. (Fasting visits only)**

NMR-derived lipid profiles

| Lipids<br>N*                                         | Visit | DM PE+<br>22 | <sup>a</sup> p | DM PE-<br>62 | <sup>b</sup> p | DM-<br>18  |
|------------------------------------------------------|-------|--------------|----------------|--------------|----------------|------------|
| Total LDL<br>particles<br>(nmol/L)                   | 1     | 937 ± 135    | <b>0.01</b>    | 759 ± 151    | 0.33           | 847 ± 181  |
|                                                      | 2     | 1193 ± 170   | <b>0.02</b>    | 1000 ± 157   | 0.24           | 1133 ± 244 |
|                                                      | 3     | 1488 ± 233   | 0.11           | 1311 ± 210   | 0.24           | 1486 ± 327 |
|                                                      | Term  | -            | -              | 1282 ± 236   | 0.31           | 1575 ± 424 |
| IDL<br>particles<br>(nmol/L)                         | 1     | 39 ± 56      | 0.15           | 20 ± 36      | 0.56           | 30 ± 63    |
|                                                      | 2     | 63 ± 68      | 0.37           | 48 ± 69      | 0.10           | 83 ± 79    |
|                                                      | 3     | 163 ± 101    | 0.56           | 147 ± 118    | 0.59           | 130 ± 124  |
|                                                      | Term  | -            | -              | 208 ± 143    | 0.80           | 194 ± 106  |
| Large LDL<br>particles<br>(nmol/L)                   | 1     | 545 ± 171    | 0.14           | 481 ± 176    | 0.18           | 536 ± 139  |
|                                                      | 2     | 919 ± 255    | 0.05           | 794 ± 237    | 0.97           | 796 ± 260  |
|                                                      | 3     | 1004 ± 279   | 0.61           | 966 ± 341    | 0.99           | 965 ± 298  |
|                                                      | Term  | -            | -              | 951 ± 377    | 0.67           | 898 ± 226  |
| Small LDL<br>particles<br>(nmol/L)                   | 1     | 390 ± 235    | 0.24           | 314 ± 314    | 0.71           | 352 ± 382  |
|                                                      | 2     | 259 ± 402    | 0.57           | 206 ± 290    | 0.22           | 356 ± 498  |
|                                                      | 3     | 392 ± 445    | 0.24           | 262 ± 388    | 0.15           | 534 ± 783  |
|                                                      | Term  | -            | -              | 198 ± 340    | 0.15           | 689 ± 904  |
| Medium<br>small LDL<br>particles<br>(nmol/L)         | 1     | 77 ± 44      | 0.49           | 68 ± 66      | 0.83           | 72 ± 76    |
|                                                      | 2     | 46 ± 72      | 0.89           | 43 ± 59      | 0.27           | 69 ± 95    |
|                                                      | 3     | 66 ± 77      | 0.43           | 51 ± 73      | 0.17           | 99 ± 147   |
|                                                      | Term  | -            | -              | 43 ± 64      | 0.19           | 121 ± 159  |
| Very small<br>LDL particles<br>(nmol/L)              | 1     | 313 ± 195    | 0.20           | 246 ± 254    | 0.68           | 280 ± 308  |
|                                                      | 2     | 214 ± 330    | 0.51           | 163 ± 236    | 0.22           | 287 ± 405  |
|                                                      | 3     | 325 ± 369    | 0.21           | 211 ± 317    | 0.14           | 435 ± 636  |
|                                                      | Term  | -            | -              | 155 ± 277    | 0.14           | 568 ± 745  |
| Total VLDL +<br>Chylomicron<br>particles<br>(nmol/L) | 1     | 25 ± 19      | 0.67           | 27 ± 22      | 0.56           | 29 ± 12    |
|                                                      | 2     | 46 ± 33      | 0.57           | 41 ± 26      | 0.27           | 48 ± 24    |
|                                                      | 3     | 90 ± 58      | 0.64           | 83 ± 54      | 0.65           | 77 ± 44    |
|                                                      | Term  | -            | -              | 97 ± 43      | 0.17           | 130 ± 60   |

|                                                      |      |   |           |      |   |           |      |   |            |
|------------------------------------------------------|------|---|-----------|------|---|-----------|------|---|------------|
| Large VLDL +<br>Chylomicron<br>particles<br>(nmol/L) | 1    | ● | 0.7 ± 0.8 | 0.91 | ● | 0.6 ± 1.1 | 0.50 | ● | 1.1 ± 2.6  |
|                                                      | 2    | ┆ | 0.8 ± 0.8 | 0.07 | ┆ | 1.4 ± 2.3 | 0.48 | ┆ | 1.9 ± 2.2  |
|                                                      | 3    | ● | 3.1 ± 2.4 | 0.65 | ● | 3.4 ± 4.1 | 0.86 | ● | 3.3 ± 3.5  |
|                                                      | Term |   | -         | -    |   | 4.3 ± 4.4 | 0.89 |   | 4.5 ± 3.1  |
| Medium<br>VLDL particles<br>(nmol/L)                 | 1    | ● | 8 ± 5     | 0.07 | ● | 12 ± 9    | 0.48 | ● | 13 ± 10    |
|                                                      | 2    | ┆ | 21 ± 14   | 0.62 | ┆ | 19 ± 12   | 0.60 | ┆ | 22 ± 15    |
|                                                      | 3    | ● | 40 ± 29   | 0.87 | ● | 33 ± 22   | 0.87 | ● | 34 ± 19    |
|                                                      | Term |   | -         | -    |   | 38 ± 20   | 0.06 |   | 63 ± 32    |
| Small<br>VLDL particles<br>(nmol/L)                  | 1    | ● | 16 ± 15   | 0.79 | ● | 15 ± 16   | 0.62 | ● | 13 ± 9     |
|                                                      | 2    | ┆ | 21 ± 18   | 0.81 | ┆ | 20 ± 16   | 0.28 | ┆ | 25 ± 16    |
|                                                      | 3    | ● | 47 ± 36   | 0.48 | ● | 41 ± 27   | 0.45 | ● | 40 ± 29    |
|                                                      | Term |   | -         | -    |   | 55 ± 32   | 0.56 |   | 63 ± 33    |
| <hr/>                                                |      |   |           |      |   |           |      |   |            |
| Total<br>HDL particles<br>(μmol/L)                   | 1    |   | 32 ± 5    | 0.18 |   | 30 ± 6    | 0.40 |   | 31 ± 4     |
|                                                      | 2    |   | 35 ± 6    | 0.26 |   | 34 ± 6    | 0.82 |   | 34 ± 5     |
|                                                      | 3    |   | 34 ± 5    | 0.77 |   | 33 ± 5    | 0.61 |   | 32 ± 5     |
|                                                      | Term |   | -         | -    |   | 35 ± 8    | 0.45 |   | 33 ± 5     |
| Large<br>HDL particles<br>(μmol/L)                   | 1    |   | 11 ± 2    | 0.22 |   | 12 ± 3    | 0.90 |   | 12 ± 3     |
|                                                      | 2    |   | 14 ± 3    | 0.73 |   | 14 ± 3    | 0.21 |   | 13 ± 3     |
|                                                      | 3    |   | 13 ± 3    | 0.99 |   | 13 ± 3    | 0.30 |   | 12 ± 3     |
|                                                      | Term |   | -         | -    |   | 13 ± 3    | 0.17 |   | 11 ± 3     |
| Medium<br>HDL particles<br>(μmol/L)                  | 1    | ● | 2.9 ± 3.2 | 0.34 | ● | 2.1 ± 3.0 | 0.57 | ● | 1.7 ± 2.8  |
|                                                      | 2    | ┆ | 1.2 ± 2.6 | 0.64 | ┆ | 0.9 ± 1.9 | 0.55 | ┆ | 1.5 ± 3.8  |
|                                                      | 3    | ● | 0.4 ± 0.8 | 0.33 | ● | 0.7 ± 1.9 | 0.64 | ● | 0.5 ± 1.5  |
|                                                      | Term |   | -         | -    |   | 1.0 ± 2.0 | 0.08 |   | 0.03 ± 0.1 |
| Small<br>HDL particles<br>(μmol/L)                   | 1    | ● | 17 ± 5    | 0.33 | ● | 15 ± 5    | 0.28 | ● | 17 ± 5     |
|                                                      | 2    | ┆ | 20 ± 5    | 0.23 | ┆ | 19 ± 5    | 0.62 | ┆ | 19 ± 6     |
|                                                      | 3    | ● | 20 ± 5    | 0.67 | ● | 20 ± 5    | 0.98 | ● | 20 ± 6     |
|                                                      | Term |   | -         | -    |   | 21 ± 6    | 0.70 |   | 21 ± 5     |

\* Mean N confirmed fasting in each group. Values are shown as mean ± SD.

<sup>a</sup>p: DM PE+ versus DM PE-, <sup>b</sup>p: DM PE- versus DM-, p values <0.05 are shown in boldface.

DM, Diabetes Mellitus, DM-, non-diabetic controls, PE+, Pre-eclampsia, PE-, no Pre-eclampsia.

● Significant increase (except decrease in medium HDL) (time trend analyses, visits 1-3; p<0.01)

**Supplemental Table 3. (Fasting visits only)**

ADLS -based lipid profiles

| Lipids                       | Visit | DM PE+   | <sup>a</sup> p | DM PE-   | <sup>b</sup> p | DM-      |
|------------------------------|-------|----------|----------------|----------|----------------|----------|
| N*                           |       | 22       |                | 62       |                | 18       |
| Lp-B (mg/dL)                 | 1     | 53 ± 6   | 0.17           | 51 ± 4   | 0.07           | 54 ± 5   |
|                              | 2     | 62 ± 8   | 0.57           | 61 ± 5   | 0.21           | 62 ± 5   |
|                              | 3     | 68 ± 7   | 0.47           | 67 ± 6   | 0.84           | 68 ± 8   |
|                              | Term  | -        | -              | 65 ± 7   | 0.20           | 70 ± 10  |
| Lp-B:C (mg/dL)               | 1     | 10 ± 3   | 0.88           | 10 ± 4   | 0.32           | 11 ± 4   |
|                              | 2     | 13 ± 4   | 0.10           | 11 ± 4   | 0.16           | 12 ± 4   |
|                              | 3     | 11 ± 5   | 0.98           | 11 ± 4   | 0.77           | 11 ± 4   |
|                              | Term  | -        | -              | 12 ± 6   | 0.55           | 10 ± 4   |
| Lp-B:E +<br>Lp-B:C:E (mg/dL) | 1     | 12 ± 3   | 0.68           | 11 ± 4   | 0.95           | 11 ± 4   |
|                              | 2     | 12 ± 5   | 0.75           | 11 ± 5   | 0.93           | 11 ± 4   |
|                              | 3     | 15 ± 6   | 0.63           | 14 ± 5   | 0.40           | 16 ± 6   |
|                              | Term  | -        | -              | 17 ± 6   | 0.89           | 17 ± 5   |
| Lp-All:B:C:D:E<br>(mg/dL)    | 1     | 11 ± 5   | 0.67           | 10 ± 4   | 0.09           | 13 ± 5   |
|                              | 2     | 12 ± 4   | 0.31           | 11 ± 5   | 0.37           | 12 ± 5   |
|                              | 3     | 16 ± 8   | 0.68           | 15 ± 7   | 0.63           | 15 ± 7   |
|                              | Term  | -        | -              | 17 ± 7   | 0.13           | 22 ± 7   |
| Lp-AI (mg/dL)                | 1     | 39 ± 3   | 0.83           | 39 ± 3   | 0.76           | 39 ± 4   |
|                              | 2     | 41 ± 3   | 0.76           | 40 ± 3   | 0.11           | 39 ± 3   |
|                              | 3     | 39 ± 3   | 0.51           | 39 ± 4   | 0.63           | 40 ± 3   |
|                              | Term  | -        | -              | 39 ± 4   | 0.55           | 39 ± 4   |
| Lp-AI:All (mg/dL)            | 1     | 110 ± 8  | 0.49           | 112 ± 11 | 0.99           | 112 ± 11 |
|                              | 2     | 124 ± 12 | 0.36           | 122 ± 11 | 0.10           | 126 ± 9  |
|                              | 3     | 113 ± 11 | 0.16           | 118 ± 13 | 0.38           | 115 ± 10 |
|                              | Term  | -        | -              | 114 ± 14 | 0.90           | 114 ± 12 |

\*Mean N confirmed fasting in each group. Values are shown as mean ± SD.

<sup>a</sup>p: DM PE+ versus DM PE-, <sup>b</sup>p: DM PE- versus DM-.

DM, Diabetes Mellitus, DM-, non-diabetic controls, PE+, Pre-eclampsia, PE-, no Pre-eclampsia, ADLS, apolipoprotein-defined lipoprotein subclass

⌋ Significant increase (time trend analyses, visits 1-3;  $p < 0.01$ )

**Supplemental Table 4. (Fasting visits only)**

Apo CIII- sub fractions

| Lipids<br>N*              | Visit | DM PE+<br>22 | <sup>a</sup> p | DM PE-<br>62 | <sup>b</sup> p | DM-<br>18 |
|---------------------------|-------|--------------|----------------|--------------|----------------|-----------|
| Apo CIII<br>(mg/dL)       | 1     | 10 ± 3       | 0.10           | 11 ± 3       | 0.93           | 11 ± 3    |
|                           | 2     | 15 ± 5       | 0.78           | 14 ± 3       | 0.27           | 15 ± 3    |
|                           | 3     | 18 ± 5       | 0.55           | 19 ± 5       | 0.07           | 17 ± 3    |
|                           | Term  | -            | -              | 21 ± 5       | 0.49           | 23 ± 3    |
|                           |       |              |                |              |                |           |
| Apo CIII-HS<br>(mg/dL)    | 1     | 7 ± 2        | 0.12           | 8 ± 2        | 0.79           | 8 ± 2     |
|                           | 2     | 10 ± 3       | 0.90           | 10 ± 2       | 0.88           | 10 ± 2    |
|                           | 3     | 10 ± 3       | 0.27           | 11 ± 3       | 0.09           | 10 ± 2    |
|                           | Term  | -            | -              | 12 ± 3       | 0.69           | 12 ± 3    |
|                           |       |              |                |              |                |           |
| Apo CIII-HP<br>(mg/dL)    | 1     | 3 ± 1        | 0.60           | 3 ± 1        | 0.51           | 3 ± 1     |
|                           | 2     | 5 ± 2        | 0.39           | 4 ± 1        | 0.27           | 5 ± 1     |
|                           | 3     | 8 ± 3        | 0.51           | 7 ± 2        | 0.25           | 7 ± 2     |
|                           | Term  | -            | -              | 9 ± 3        | 0.40           | 10 ± 4    |
|                           |       |              |                |              |                |           |
| Apo CIII-HS/HP<br>(mg/dL) | 1     | 2.4 ± 0.5    | <b>0.01</b>    | 2.8 ± 0.7    | 0.50           | 2.7 ± 0.8 |
|                           | 2     | 2.3 ± 0.8    | 0.42           | 2.5 ± 0.8    | 0.49           | 2.3 ± 0.9 |
|                           | 3     | 1.4 ± 0.6    | 0.20           | 1.6 ± 0.6    | 0.60           | 1.7 ± 0.8 |
|                           | Term  | -            | -              | 1.5 ± 0.5    | 0.60           | 1.4 ± 0.7 |
|                           |       |              |                |              |                |           |

\*Mean N confirmed fasting in each group. Values are shown as mean ± SD.

<sup>a</sup>p: DM PE+ versus DM PE-, <sup>b</sup>p: DM PE- versus DM-, p values <0.05 are shown in boldface.

DM, Diabetes Mellitus, DM-, non-diabetic controls, PE+, Pre-eclampsia, PE-, no Pre-eclampsia

⌋ Significant increase (except decrease in Apo CIII-HS/HP) (time trend analyses, visits 1-3; p<0.01)

**Supplemental Table 5. (Fasting visits only)**

Serum apolipoproteins

| <b>Apolipoproteins</b> | <b>Visit</b> | <b>DM PE+</b> | <b><sup>a</sup>p</b> | <b>DM PE-</b> | <b><sup>b</sup>p</b> | <b>DM-</b> |
|------------------------|--------------|---------------|----------------------|---------------|----------------------|------------|
| <b>N*</b>              |              | <b>22</b>     |                      | <b>62</b>     |                      | <b>18</b>  |
| Apo AI<br>(mg/dL)      | 1            | 174 ± 29      | 0.20                 | 184 ± 32      | 0.80                 | 186 ± 39   |
|                        | 2            | 215 ± 42      | 0.86                 | 217 ± 36      | 0.56                 | 212 ± 32   |
|                        | 3            | 205 ± 28      | 0.31                 | 213 ± 40      | 0.09                 | 197 ± 34   |
|                        | Term         | -             | -                    | 212 ± 43      | 0.41                 | 199 ± 34   |
| Apo B<br>(mg/dL)       | 1            | 83 ± 19       | 0.23                 | 77 ± 19       | 0.16                 | 84 ± 16    |
|                        | 2            | 117 ± 28      | 0.07                 | 105 ± 24      | 0.24                 | 114 ± 30   |
|                        | 3            | 146 ± 35      | 0.26                 | 136 ± 31      | 0.39                 | 144 ± 35   |
|                        | Term         | -             | -                    | 151 ± 50      | 0.50                 | 165 ± 51   |
| Apo B/ Apo AI          | 1            | 0.5 ± 0.1     | 0.05                 | 0.4 ± 0.1     | 0.32                 | 0.5 ± 0.1  |
|                        | 2            | 0.5 ± 0.1     | 0.08                 | 0.5 ± 0.1     | 0.31                 | 0.5 ± 0.1  |
|                        | 3            | 0.7 ± 0.1     | 0.32                 | 0.7 ± 0.1     | 0.25                 | 0.7 ± 0.1  |
|                        | Term         | -             | -                    | 0.7 ± 0.1     | 0.36                 | 0.8 ± 0.2  |
| Lp (a)<br>(mg/dL)      | 1            | 13 ± 11       | 0.84                 | 14 ± 8        | 0.83                 | 15 ± 12    |
|                        | 2            | 16 ± 16       | 0.64                 | 14 ± 8        | 0.77                 | 12 ± 9     |
|                        | 3            | 15 ± 13       | 0.64                 | 13 ± 9        | 0.91                 | 14 ± 10    |
|                        | Term         | -             | -                    | 15 ± 9        | 0.71                 | 12 ± 12    |

\*Mean N confirmed fasting in each group. Values are shown as mean ± SD.

<sup>a</sup>p: DM PE+ versus DM PE-, <sup>b</sup>p: DM PE- versus DM-.

DM, Diabetes Mellitus, DM-, non-diabetic controls, PE+, Pre-eclampsia, PE-, no Pre-eclampsia.

● Significant increase (time trend analyses, visits 1-3; p<0.01)
